# Supplementary material for: The efficacy of pre-operative oral aceclofenac and intra-ligamentary mepivacaine on the success of failed inferior alveolar nerve block in patients with symptomatic irreversible pulpitis: a prospective, randomised, double-blinded clinical trial
Source: PeerJ. 2025 Apr 30;13:e19293. doi: 10.7717/peerj.19293 (PMC12049097; doi:10.7717/peerj.19293)
Supplement: Supplemental Information 1 [file peerj-13-19293-s001.xlsx]

## Sheet: Sheet1
Serial Number	Group	Patient Number	Gender	Age Group	Tooth number	Preoperative Pain (100)	Preoperative Pain (170)	10 minutes after IANB (100)	10 minutes after IANB (170)	Dentin (100)	Dentin (170)	Pulp Chamber (100)	Pulp Chamber (170)	Instrumentation (100)	Instrumentation (170)	Post Instrumentation (100)	Post Instrumentation (170)	Instrumentation (100)
1	1	1	M	26	37	70	119	20	34	30	51	0	0	0	0		0	0
2	1	2	F	47	46	75	127.5	0	0	0	0	25	42.5	30	51		0	30
3	1	3	M	21	37	80	136	10	17	10	17	50	85	35	59.5		0	35
4	1	4	F	33	36	90	153	25	42.5	35	59.5	20	34	20	34		0	20
5	1	5	M	49	46	65	110.5	10	17	10	17	10	17	15	25.5	0	0	15
6	1	6	F	30	36	75	127.5	0	0	0	0	25	42.5	5	8.5		0	5
7	1	7	M	19	47	80	136	10	17	25	42.5	10	17	5	8.5		0	5
8	1	8	M	42	46	75	127.5	20	34	20	34	25	42.5	0	0		0	0
9	1	9	F	31	46	60	102	0	0	0	0	50	85	10	17		0	10
10	1	10	F	19	36	70	119	0	0	10	17	0	0	0	0		0	0
11	1	11	F	29	47	70	119	10	17	10	17	50	85	10	17		0	10
12	1	12	M	36	46	50	85	0	0	0	0	0	0	10	17	0	0	10
13	1	13	F	29	36	65	110.5	0	0	30	51	0	0	10	17		0	10
14	1	14	M	32	37	80	136	20	34	20	34	40	68	5	8.5		0	5
15	1	15	F	43	36	70	119	10	17	10	17	35	59.5	35	59.5		0	35
16	1	16	M	36	47	95	161.5	20	34	40	68	40	68	50	85	40	68	50
17	1	17	M	21	36	85	144.5	25	42.5	25	42.5	30	51	10	17		0	10
18	1	18	F	20	46	70	119	0	0	25	42.5	10	17	10	17		0	10
19	1	19	M	31	37	75	127.5	10	17	35	59.5	30	51	30	51		0	0
20	1	20	M	33	36	80	136	15	25.5	20	34	15	25.5	15	25.5		0	15
21	1	21	F	47	47	55	93.5	10	17	20	34	0	0	0	0		0	0
22	1	22	M	39	37	70	119	20	34	20	34	40	68	30	51		0	30
23	1	23	F	25	46	90	153	15	25.5	15	25.5	50	85	10	17		0	10
24	1	24	F	27	36	85	144.5	0	0	0	0	20	34	0	0		0	0
25	1	25	M	44	37	60	102	10	17	20	34	10	17	0	0		0	0
26	1	26	F	29	36	75	127.5	15	25.5	15	25.5	25	42.5	10	17		0	10
27	1	27	F	38	37	80	136	20	34	50	85	15	25.5	15	25.5		0	15
28	1	28	M	23	36	55	93.5	0	0	0	0	10	17	0	0		0	0
29	1	29	F	36	36	70	119	10	17	10	17	15	25.5	0	0		0	0
30	1	30	M	37	46	85	144.5	15	25.5	25	42.5	15	25.5	0	0		0	0
31	1	31	F	51	47	50	85	10	17	35	59.5	30	51	30	51		0	30
32	2	1	F	46	47	75	127.5	15	25.5	15	25.5	30	51	10	17		0	10
33	2	2	M	44	46	90	153	0	0	10	17	40	68	30	51		0	30
34	2	3	M	32	36	70	119	10	17	10	17	10	17	20	34	5	8.5	20
35	2	4	M	27	36	75	127.5	15	25.5	30	51	10	17	0	0		0	0
36	2	5	M	39	36	80	136	25	42.5	25	42.5	40	68	15	25.5		0	15
37	2	6	F	45	46	55	93.5	0	0	0	0	0	0	10	17	5	8.5	10
38	2	7	M	26	47	60	102	10	17	10	17	20	34	0	0		0	0
39	2	8	F	35	37	85	144.5	0	0	0	0	35	59.5	15	25.5		0	15
40	2	9	F	48	46	75	127.5	10	17	20	34	10	17	30	51		0	30
41	2	10	M	37	36	75	127.5	15	25.5	15	25.5	15	25.5	20	34	10	17	20
42	2	11	M	28	36	80	136	10	17	20	34	10	17	0	0		0	0
43	2	12	F	19	36	65	110.5	0	0	0	0	20	34	35	59.5		0	35
44	2	13	F	63	37	70	119	10	17	25	42.5	0	0	0	0		0	0
45	2	14	M	22	47	75	127.5	0	0	0	0	30	51	45	76.5		0	45
46	2	15	F	19	46	90	153	10	17	10	17	50	85	20	34		0	20
47	2	16	F	46	46	50	85	0	0	0	0	20	34	10	17		0	10
48	2	17	M	34	47	75	127.5	10	17	10	17	30	51	15	25.5		0	15
49	2	18	F	41	46	85	144.5	15	25.5	15	25.5	25	42.5	30	51		0	30
50	2	19	M	24	36	70	119	0	0	0	0	0	0	20	34	10	17	20
51	2	20	F	47	47	85	144.5	20	34	25	42.5	10	17	30	51		0	30
52	2	21	F	45	47	80	136	10	17	10	17	25	42.5	0	0		0	0
53	2	22	M	61	46	60	102	0	0	0	0	10	17	40	68		0	40
54	2	23	M	22	36	75	127.5	25	42.5	30	51	10	17	5	8.5		0	5
55	2	24	F	52	47	55	93.5	10	17	10	17	20	34	30	51		0	30
56	2	25	F	28	37	70	119	20	34	20	34	40	68	10	17		0	10
57	2	26	M	24	47	95	161.5	0	0	0	0	20	34	0	0		0	0
58	2	27	F	59	36	85	144.5	10	17	20	34	0	0	35	59.5		0	35
59	2	28	M	22	37	65	110.5	0	0	0	0	20	34	5	8.5		0	5
60	2	29	F	40	46	75	127.5	15	25.5	20	34	15	25.5	15	25.5		0	15
61	2	30	F	36	37	50	85	0	0	0	0	20	34	35	59.5		0	35
62	3	1	M	49	47	80	136	10	17	10	17	30	51	35	59.5		0	35
63	3	2	F	30	36	70	119	15	25.5	30	51	10	17	5	8.5		0	5
64	3	3	F	19	47	90	153	0	0	0	0	20	34	10	17		0	10
65	3	4	M	26	36	65	110.5	20	34	20	34	40	68	30	51		0	30
66	3	5	M	18	37	75	127.5	15	25.5	15	25.5	15	25.5	30	51	15	25.5	30
67	3	6	F	28	36	85	144.5	25	42.5	25	42.5	35	59.5	15	25.5		0	15
68	3	7	F	24	36	70	119	0	0	0	0	20	34	30	51		0	30
69	3	8	F	50	36	50	85	0	0	0	0	0	0	25	42.5	10	17	25
70	3	9	M	21	37	65	110.5	10	17	20	34	10	17	35	59.5		0	35
71	3	10	F	47	37	70	119	10	17	10	17	35	59.5	0	0		0	0
72	3	11	M	59	46	80	136	0	0	0	0	30	51	35	59.5		0	35
73	3	12	F	53	37	95	161.5	0	0	0	0	45	76.5	15	25.5		0	15
74	3	13	F	36	46	50	85	10	17	10	17	25	42.5	30	51		0	30
75	3	14	M	50	46	70	119	15	25.5	15	25.5	30	51	10	17		0	10
76	3	15	F	33	37	75	127.5	20	34	30	51	15	25.5	10	17		0	10
77	3	16	M	44	37	85	144.5	10	17	10	17	10	17	20	34	10	17	20
78	3	17	M	35	46	80	136	0	0	0	0	20	34	40	68		0	40
79	3	18	F	56	37	65	110.5	20	34	20	34	20	34	30	51	10	17	0
80	3	19	M	38	47	85	144.5	15	25.5	40	68	15	25.5	40	68		0	40
81	3	20	M	49	36	75	127.5	10	17	10	17	30	51	10	17		0	10
82	3	21	F	21	36	55	93.5	0	0	0	0	25	42.5	35	59.5		0	35
83	3	22	F	28	46	80	136	10	17	30	51	10	17	5	8.5		0	5
84	3	23	M	29	37	70	119	10	17	10	17	10	17	30	51	30	51	30
85	3	24	F	61	47	75	127.5	0	0	20	34	10	17	10	17		0	10
86	3	25	F	44	36	80	136	15	25.5	15	25.5	25	42.5	30	51		0	30
87	3	26	M	31	47	65	110.5	10	17	10	17	10	17	15	25.5	0	0	15
88	3	27	F	55	36	85	144.5	0	0	0	0	40	68	35	59.5		0	35
89	3	28	M	40	47	70	119	15	25.5	25	42.5	10	17	5	8.5		0	5
90	3	29	F	21	37	50	85	0	0	15	25.5	0	0	0	0		0	0
91	3	30	F	32	36	90	153	20	34	20	34	35	59.5	10	17		0	10
92	3	31	M	24	37	75	127.5	10	17	30	51	5	8.5	5	8.5		0	5
93	3	32	F	35	46	60	102	20	34	30	51	10	17	5	8.5		0	5
94	3	33	F	54	47	95	161.5	30	51	10	17	10	17	5	8.5		0	5
95	4	1	M	23	37	70	119	0	0	0	0	20	34	10	17		0	10
96	4	2	F	38	36	75	127.5	0	0	25	42.5	10	17	30	51		0	30
97	4	3	F	43	36	60	102	0	0	0	0	0	0	10	17	5	8.5	10
98	4	4	M	24	46	85	144.5	20	34	20	34	30	51	30	51		0	30
99	4	5	M	52	47	65	110.5	10	17	20	34	5	8.5	10	17	0	0	10
100	4	6	F	46	46	70	119	15	25.5	15	25.5	25	42.5	10	17		0	10
101	4	7	M	58	36	55	93.5	10	17	10	17	10	17	35	59.5	0	0	35
102	4	8	F	39	36	70	119	0	0	15	25.5	10	17	0	0		0	0
103	4	9	F	34	37	95	161.5	15	25.5	30	51	40	68	35	59.5	30	51	35
104	4	10	M	60	46	60	102	25	42.5	25	42.5	10	17	40	68		0	40
105	4	11	M	27	47	85	144.5	20	34	25	42.5	5	8.5	0	0		0	0
106	4	12	F	42	37	75	127.5	0	0	0	0	20	34	40	68		0	40
107	4	13	F	53	37	65	110.5	25	42.5	25	42.5	30	51	20	34		0	20
108	4	14	F	22	47	75	127.5	10	17	30	51	10	17	10	17		0	10
109	4	15	M	38	36	75	127.5	15	25.5	15	25.5	25	42.5	30	51		0	30
110	4	16	F	47	47	90	153	10	17	10	17	30	51	15	25.5		0	15
111	4	17	F	30	46	65	110.5	20	34	20	34	20	34	25	42.5	10	17	25
112	4	18	F	64	36	50	85	0	0	10	17	0	0	0	0		0	0
113	4	19	M	48	36	70	119	10	17	10	17	25	42.5	35	59.5		0	35
114	4	20	M	30	46	55	93.5	0	0	0	0	10	17	0	0		0	0
115	4	21	F	20	46	80	136	20	34	30	51	20	34	15	25.5		0	15
116	4	22	F	41	47	90	153	10	17	10	17	35	59.5	10	17		0	10
117	4	23	M	21	37	85	144.5	15	25.5	25	42.5	15	25.5	35	59.5		0	35
118	4	24	F	27	36	65	110.5	20	34	20	34	20	34	30	51	10	17	30
119	4	25	F	25	46	50	85	0	0	0	0	15	25.5	0	0		0	0
120	4	26	M	38	46	75	127.5	10	17	20	34	10	17	35	59.5		0	35
121	4	27	F	49	47	85	144.5	25	42.5	25	42.5	40	68	40	68	35	59.5	40
122	4	28	M	37	36	70	119	15	25.5	30	51	10	17	30	51		0	30
123	4	29	M	53	47	55	93.5	10	17	20	34	10	17	35	59.5		0	35
124	4	30	F	22	37	95	161.5	15	25.5	25	42.5	10	17	10	17		0	10
125	4	31	M	35	46	65	110.5	0	0	30	51	10	17	30	51		0	30
126	4	32	M	29	37	75	127.5	10	17	10	17	25	42.5	0	0		0	0
